# Supplementary material
Source: MDPI journal article supplement (https://www.mdpi.com/1999-4907/13/7/1127)
Supplement: s1 [file s1]

| Cultivar |    | Young fruit stage | Expanding stage | Half-veraison fruit stage | Veraison fruit stage | Ripe fruit stage |
|----------|----|-------------------|-----------------|---------------------------|----------------------|------------------|
| Adelinia | CK | May 20            | May 30          | June 10                   | June 20              | June 30          |
|          | T1 | May 20            | June 10         | June 20                   | June 30              | July 10          |
|          | T2 | May 20            | June 10         | June 20                   | June 30              | July 10          |
| Heifeng  | CK | May 20            | May 30          | June 10                   | June 20              | June 30          |
|          | T1 | May 20            | June 10         | June 20                   | June 30              | July 10          |
|          | T2 | May 20            | June 10         | June 20                   | June 30              | July 10          |

**Table S1.** Effect of shading on the fruiting phenology of ‘Adelinia’and ‘Heifeng’
